# Supplementary material for: Dissection of the Major Hematopoietic Quantitative Trait Locus in Chromosome 6q23.3 Identifies miR-3662 as a Player in Hematopoiesis and Acute Myeloid Leukemia
Source: Oxford University Press journal article supplement (doi:10.1158/2159-8290.cd-16-0023), 2016-06-29

## **Supplementary Material:**

### **Dissection of the major hematopoietic quantitative trait locus in chromosome 6q23.3 identifies miR-3662 as a novel player in hematopoiesis and acute myeloid leukemia**

Sophia E. Maharry<sup>1</sup>, Christopher J. Walker<sup>1</sup>, Sandya Liyanarachchi<sup>1</sup>, Sujay Mehta<sup>1</sup>, Mitra Patel<sup>1</sup>, Maryam A. Bainazar<sup>1</sup>, Xiaomeng Huang<sup>1</sup>, Malori A. Lankenau<sup>1</sup>, Kevin W. Hoag<sup>1</sup>, Parvathi Ranganathan<sup>1</sup>, Ramiro Garzon<sup>1</sup>, James S. Blachly<sup>1</sup>, Denis C. Guttridge<sup>1</sup>, Clara D. Bloomfield<sup>1,#</sup>, Albert de la Chapelle<sup>1,#</sup>,  
and Ann-Kathrin Eisfeld<sup>1,#,§</sup>

<sup>1</sup>The Ohio State University Comprehensive Cancer Center, Columbus, Ohio, 43210, USA

<sup>#</sup> all senior authors contributed to the work equally

§ Correspondence:

Ann-Kathrin Eisfeld, MD

The Ohio State University Comprehensive Cancer Center

460W. 12th Ave, BRT Room 850, Columbus, OH 43210, USA

Phone: +1/614-688-4171

Email: ann-kathrin.eisfeld@osumc.edu

**Supplementary Table 1. Linkage disequilibrium patterns of the tag-SNPs used for genotyping the 6q23.3 locus.** All ten SNPs have previously been identified in independent genome-wide association studies (GWASs) to be associated with various hematologic traits (see Table 1 for details). Because of the high linkage disequilibrium among the SNPs, genotyping of four SNPs was sufficient to determine all genotypes (Tag-SNPs highlighted in grey).

| SNP                      | Tag-SNP   | R <sup>2</sup> value SNP/tag-SNP<br>(cut-off: 0.9) |
|--------------------------|-----------|----------------------------------------------------|
| rs7775698/<br>rs66650371 | rs7775698 | 1                                                  |
| rs7776054                | rs9402686 | 0.906                                              |
| rs9399137                | rs9402686 | 0.916                                              |
| rs9373124                | rs9402686 | 0.947                                              |
| rs4895441                | rs9402686 | 1                                                  |
| rs9376092                | rs9402686 | 0.99                                               |
| rs9402686                | rs9402686 | 1                                                  |
| rs9494145                | rs9483788 | 0.908                                              |
| rs9483788                | rs9483788 | 1                                                  |
| rs6569992                | rs6569992 | 1                                                  |

**Supplementary Table 2. Cytogenetic and molecular information on AML patients used for functional studies (n=12).** Endogenous miR-3662 expression levels were determined using qPCR in primary leukemic blasts isolated from all patients. All patients had low endogenous miR-3662 expression compared to mononuclear cells isolated from non-leukemic donors. In addition, the primary leukemic blasts from patients 1-12 were infected with lentiviral miR-3662 for stable expression, which was validated after 48h. Primary leukemic blasts from patients 1-7 successfully overexpressed miR-3662, and displayed levels similar to those observed in differentiated blood cells (positive control). Primary blasts of AML patients 1-4 had a viability  $\geq 60\%$  and were used for further *in vitro* studies (caspase-3/7 and/or TiterGlo assays). RNA isolated from primary leukemic blasts from AML patients 11 and 12 was used to perform the targeted RNA sequencing (Truseq).

| AML patient | rs66650371 genotype | FAB type | cytogenetics | <i>FLT3</i> -ITD | <i>NPM1</i> | miR-3662 (endogenous) | miR-3662 (forced) |
|-------------|---------------------|----------|--------------|------------------|-------------|-----------------------|-------------------|
| 1           | wt/wt               | M2       | normal       | present          | wild-type   | low                   | high              |
| 2           | wt/wt               | M1       | normal       | absent           | mutated     | low                   | high              |
| 3           | wt/wt               | n.a.     | normal       | present          | mutated     | low                   | high              |
| 4           | wt/del              | M4       | normal       | present          | wild-type   | low                   | high              |
| 5           | wt/wt               | M2       | normal       | absent           | wild-type   | low                   | high              |
| 6           | wt/wt               | n.a.     | normal       | absent           | wild-type   | low                   | high              |
| 7           | wt/del              | M2       | normal       | absent           | wild-type   | low                   | high              |
| 8           | wt/wt               | M1       | normal       | absent           | mutated     | low                   | low               |
| 9           | wt/del              | M4       | normal       | present          | wild-type   | low                   | low               |
| 10          | wt/wt               | M5       | normal       | absent           | mutated     | low                   | low               |
| 11          | wt/wt               | n.a.     | normal       | absent           | mutated     | low                   | high              |
| 12          | wt/wt               | M2       | normal       | absent           | mutated     | low                   | high              |

**Supplementary Table 3. French-American-British (FAB) classification<sup>35</sup> and molecular information on AML patients used to determine miR-3662's abundance (n=8).**

| AML patient | rs66650371 genotype | FAB type             | <i>FLT3</i> -ITD | <i>NPM1</i> |
|-------------|---------------------|----------------------|------------------|-------------|
| 1           | n.a.                | M6                   | absent           | n.a.        |
| 2           | del/del             | M6                   | n.a.             | n.a.        |
| 3           | wt/wt               | M6                   | n.a.             | n.a.        |
| 4           | wt/del              | M6                   | absent           | wild-type   |
| 5           | wt/wt               | M5b                  | present          | n.a.        |
| 6           | n.a.                | M5b                  | present          | wild-type   |
| 7           | wt/wt               | M2                   | n.a.             | n.a.        |
| 8           | wt/del              | AML with MDS changes | present          | wild-type   |

**Supplementary Table 4. Canonical pathway analysis of the miR-3662-associated gene expression signature.** Listed are the top ranking components of the Global Canonical Pathway Category (GCP) after pathway analysis of the miR-3662-associated gene expression signature (pathway names and involved molecules defined by Ingenuity). The *P*-value associated with each pathway in the Global Canonical Pathways (GCP) is a measure of the likelihood that the association between a set of focus genes in the analyzed experiment and a given pathway is due to random chance. Thus a low *P*-value identifies statistically significant over-representation of the focus genes in the pathway. It is automatically calculated by the Ingenuity program using a right-tailed Fisher's exact test.

| Pathway name (Ingenuity)          | <i>P</i> -value                        | molecules |
|-----------------------------------|----------------------------------------|-----------|
| Cell Death and Survival           | $7.9 \times 10^{-36}$ - $5.49^{-07}$   | 64        |
| Cell Cycle                        | $2.8 \times 10^{-27}$ - $4.69^{-07}$   | 40        |
| Cellular Growth and Proliferation | $1.02 \times 10^{-23}$ - $5.69^{-07}$  | 62        |
| Cellular Development              | $2.79 \times 10^{-19}$ - $2.78^{-07}$  | 55        |
| Gene Expression                   | $1.82 \times 10^{-17}$ - $5.35E^{-07}$ | 43        |

**Supplementary Figure 1. Transcription factor binding according to the transcription factor chip data from ENCODE.** Of the ten GWAS SNPs, only rs7775698/rs66650371 and rs9483788 are supposed to exhibited transcription factor binding (red boxes).

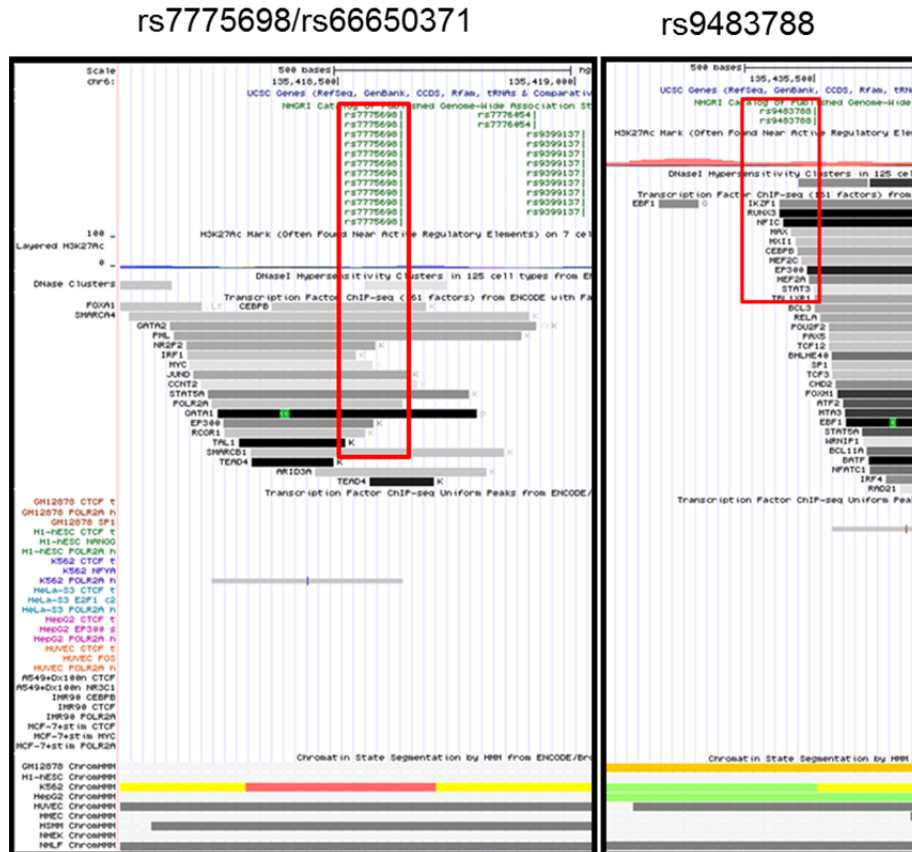

**Supplementary Figure 2. Electrophoretic mobility shift assay comparing the binding affinity of the alleles of rs66650371 and rs9483788.** While presence of the deletion increased transcription factor binding of rs66650371, no binding differences were seen for the different alleles of rs9483788.

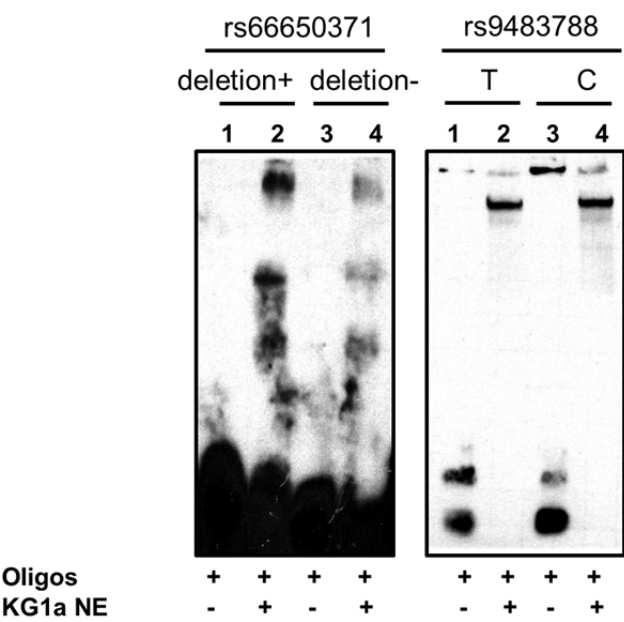

**Supplementary Figure 3.** Endogenous miR-3662 expression levels of hematopoietic progenitor (HP) cells during differentiation, total bone marrow aspirate of three non-leukemic donors (total BM 1-3), different populations of differentiated peripheral blood cells, and three AML cell lines. The abundance of total BM 2 was used as a reference.

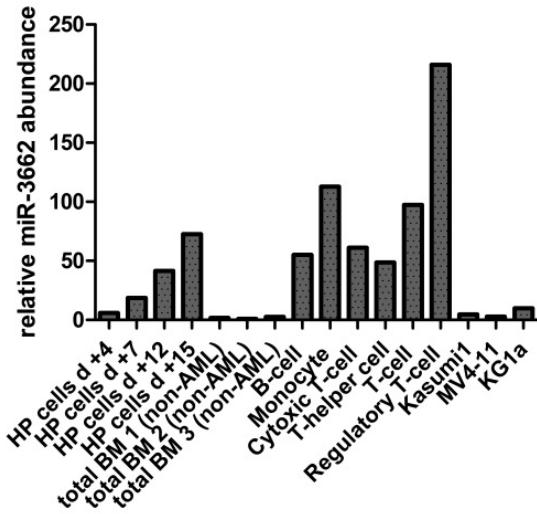



**Supplementary Figure 4. Top panel,** Macroscopic pictures of the spleens of three mice of the scramble and miR-3662-infected groups (organs harvested post-mortem). All mice had a massive splenomegaly compared to the un-injected, sacrificed control mouse. **Bottom panel,** images of spleen histologies (40x enlargement). Slides were stained for CD45 to proof MV4-11 origin of the leukemia.

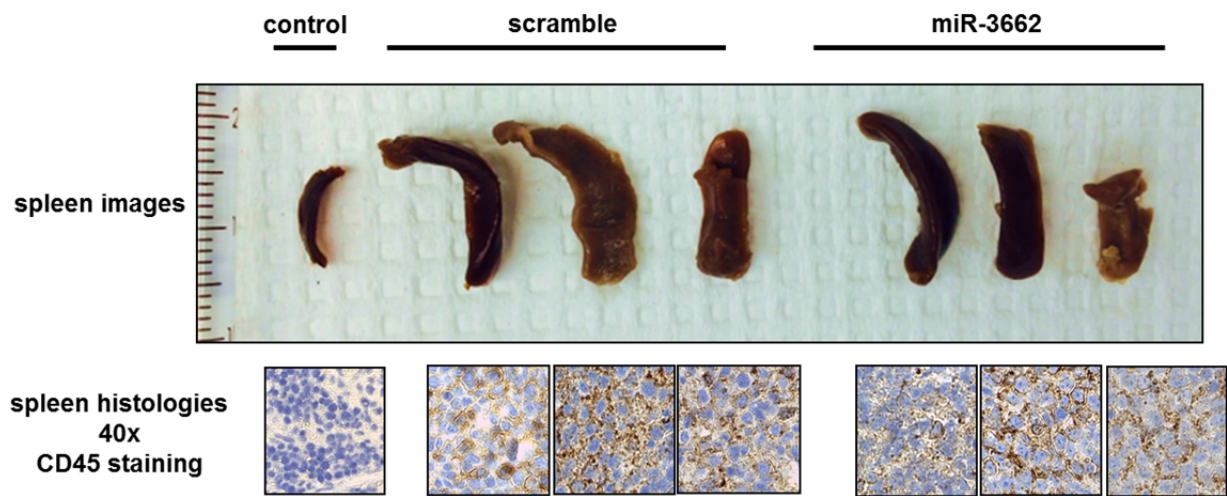

**Supplementary Figure 5.** Endogenous abundance of miR-3662 and IKBKB in patient samples and cell lines.

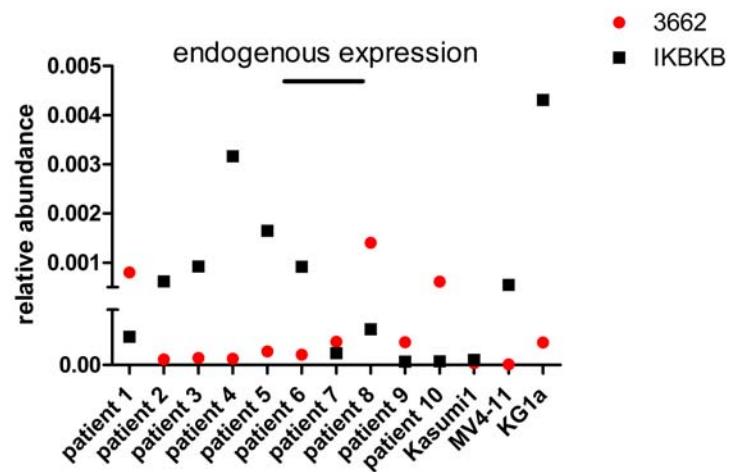

**Supplementary Figure 6.** Comparison of the relative miR-3662 abundance of AML patient blasts and AML cell lines before (black) and after (red) forced miR-3662 expression with the lentiviral expression construct.

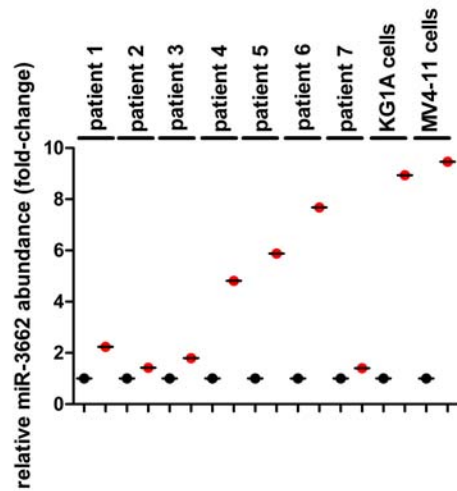

Supplement: 21598290cd160023-sup-160499_2_supp_0_p9p5kp.pdf [file 21598290cd160023-sup-160499_2_supp_0_p9p5kp.pdf]
